# Supplementary material
Source: publisher site journal article supplement (https://www.dovepress.com/article/342048)
Supplement: Supplementary file 1 [file get_supplementary_file.php]

**Supplementary** **Table 1:** List of terms used to classify entries into three treatment groups: antibiotic, probiotic, and medications.

| **Treatment group** | **Search Terms** |
| --- | --- |
| **Antibiotic** | Clarithromycin  Amoxicillin  Metronidazole  Levofloxacin  Quinolone  Tetracycline  Macrolide  Sitafloxacin  Doxycycline  Tinidazole  Amoxicillin/clavulanate  Rifabutin  Furazolidone  Rabeprazole  Rifampicin  Tetracycline |
| **Probiotic** | Lactobacillus  Bifidobacterium  Multi-strain |
| **Medications** | Proton pump inhibitor (PPI)  Esomeprazole omeprazole  Lansoprazole  Pantoprazole  Rabeprazole  Dexlansoprazole  H2- blockers  Histamine h2-receptor antagonists  Famotidine  Cimetidine  Ranitidine  Nizatidine  Bismuth citrate |

**Supplementary Table 2:** List of terms used to classify therapeutic regimens into eight groups

| **Therapeutic regimens** | Triple therapy  Sequential therapy  Bismuth quadruple therapy  Non-bismuth quadruple therapy  Hybrid therapy  First line therapy  Second line therapy  Third line therapy |
| --- | --- |

**Supplementary Table 3:** List of terms used to classify virulence and antibiotic resistance

| **Virulence** | Blood group antigen-binding adhesin (BabA),  Outer inflammatory protein (OipA),  H. pylori outer membrane protein (HopQ)  Outer membrane protein (OMP)  Cag-pathogenicity island (*cag*PAI)  Cytotoxin-associated gene A (cagA) |
| --- | --- |
| **Antibiotic resistance** | DNA gyrase subunit A (gyrA)  DNA gyrase subunit A (gyrB)  Penicillin binding proteins (PBP)  Oxygen-insensitive NADPH nitroreductase (rdxA)  NADPH flavin oxidoreductase (frxA)  30S ribosomal protein S21 (rpsU)  DppA  RpoB |
